# Supplementary figures and images for: Comparison of performance of one-color and two-color gene-expression analyses in predicting clinical endpoints of neuroblastoma patients
Source: PubMed Central journal article supplement — Pharmacogenomics J. 2010 Jul 30;10(4):258–66. doi: 10.1038/tpj.2010.53 (PMC2920066; doi:10.1038/tpj.2010.53), 2010-07-30

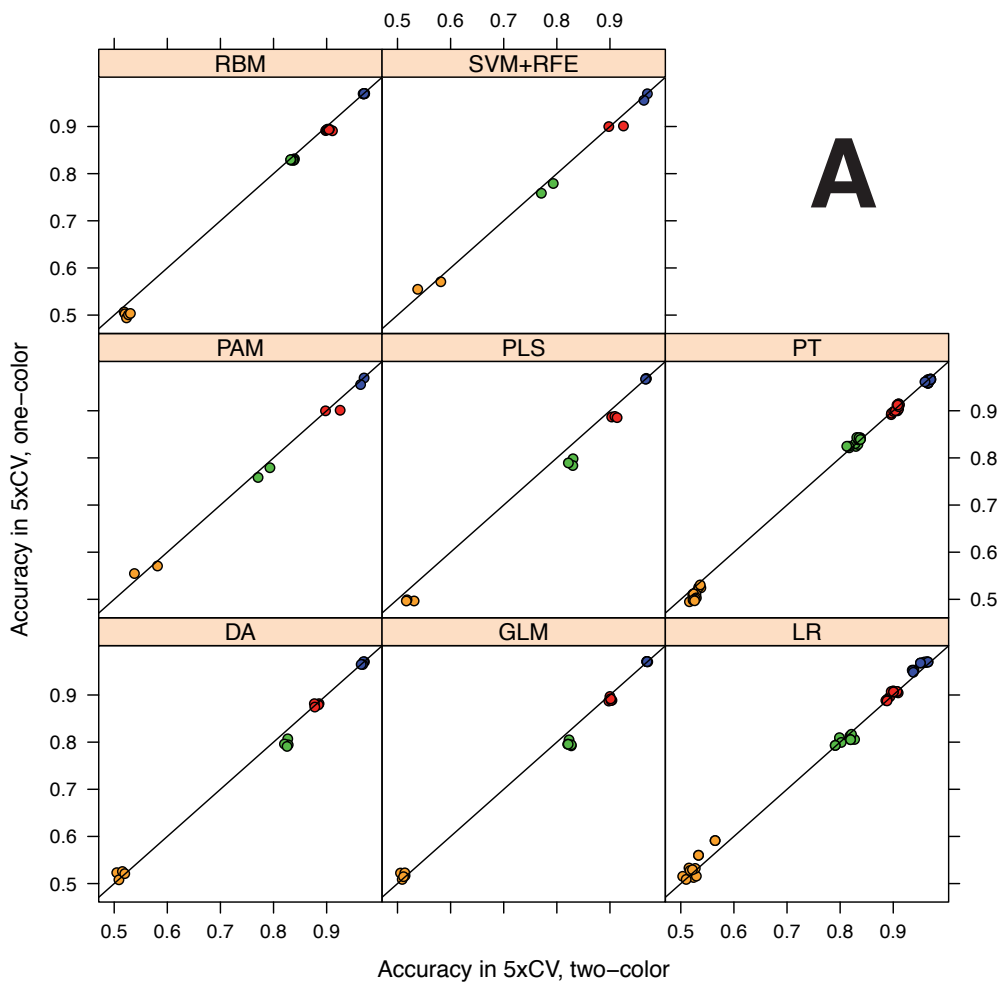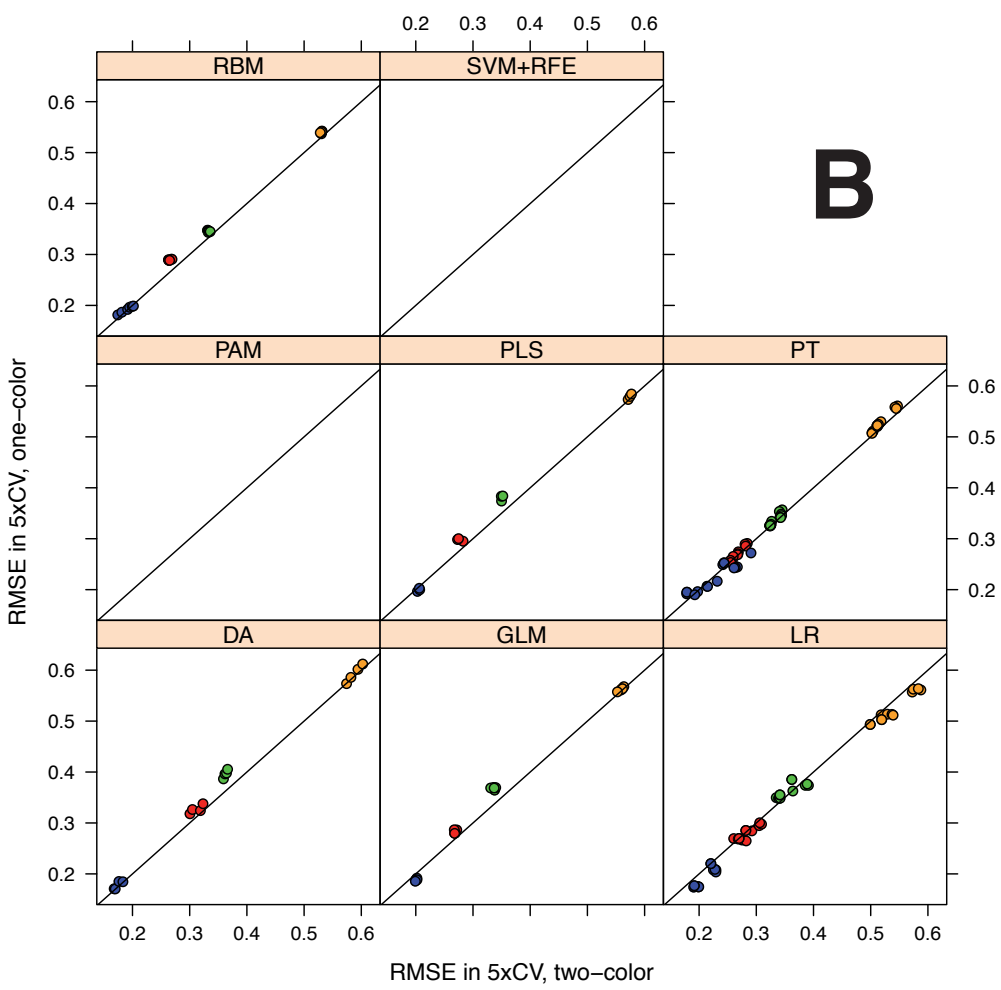

**Supplemental Figure 1**

Supplement: tpj201053x1.pdf [file tpj201053x1.pdf]

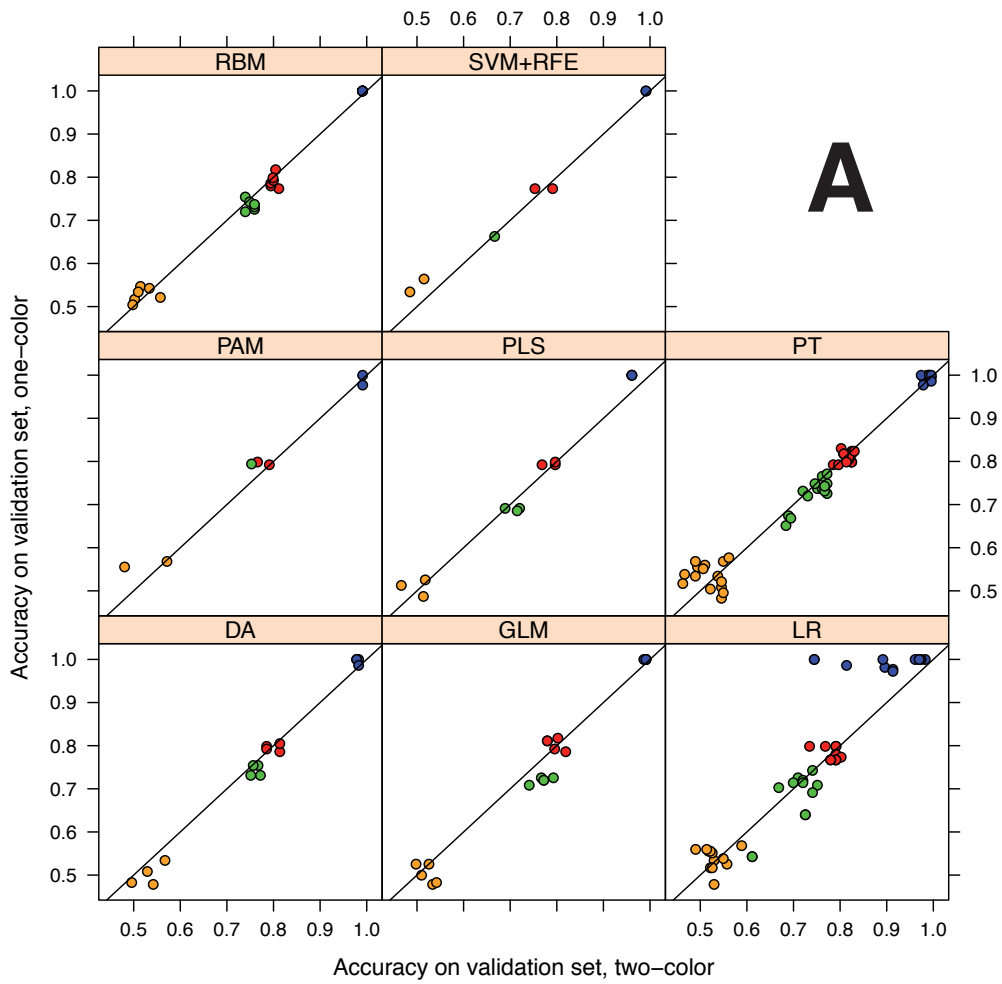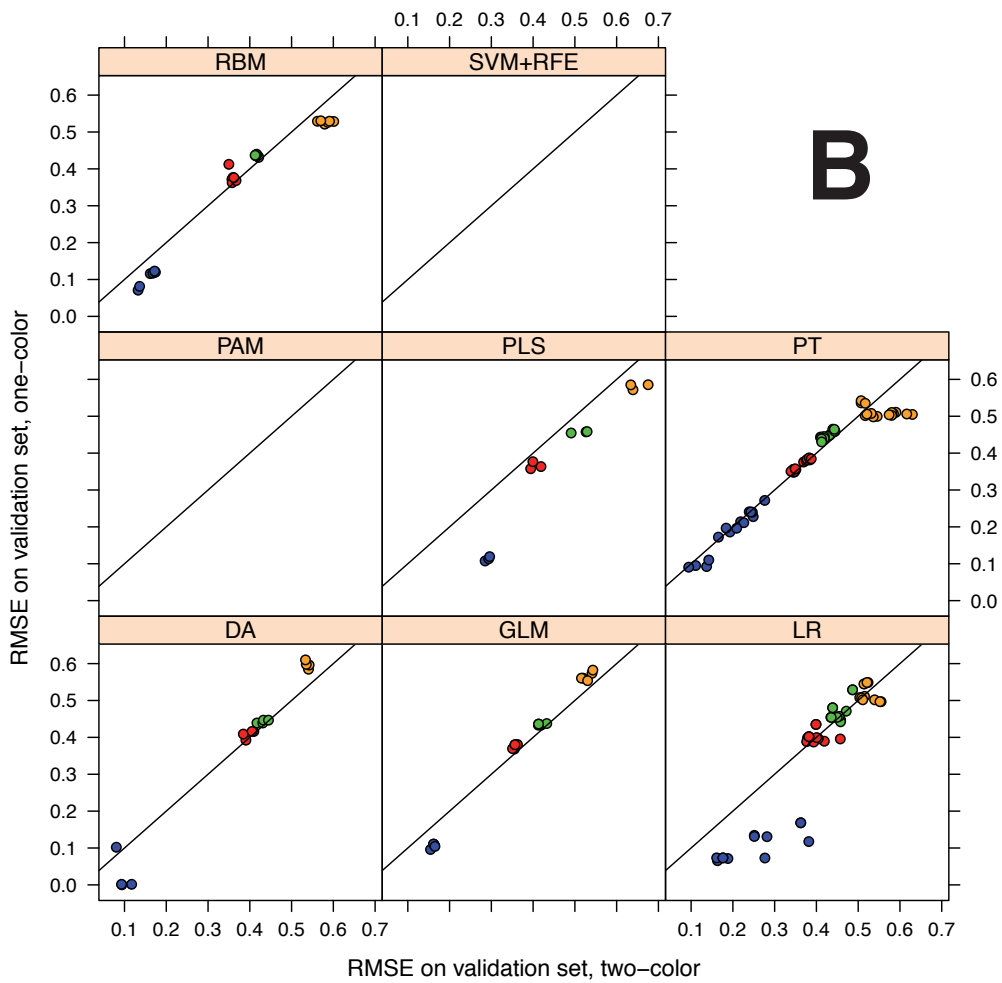

**Supplemental Figure 2**

Supplement: tpj201053x2.pdf [file tpj201053x2.pdf]
